# Supplementary material for: General practitioner residents’ experiences and perceptions of outpatient training in primary care settings in China: a qualitative study
Source: HighWire-hosted journal article supplement (doi:10.1136/bmjopen-2023-076821), 2023-09-01
Supplement: bmjopen-2023-076821supp001_data_supplement.pdf [file bmjopen-2023-076821supp001_data_supplement.pdf]

## Supplement file 1. Interview guide

| Key Areas    | Semi-structured interview guide                                                                                                                                                                                                                                                                                                                                                                                                                                                                                                                                                                                                                                                                                                                                                                                                                                                                                                                                                                                                                                                                                                                                                                                                                                                                                                        |
|--------------|----------------------------------------------------------------------------------------------------------------------------------------------------------------------------------------------------------------------------------------------------------------------------------------------------------------------------------------------------------------------------------------------------------------------------------------------------------------------------------------------------------------------------------------------------------------------------------------------------------------------------------------------------------------------------------------------------------------------------------------------------------------------------------------------------------------------------------------------------------------------------------------------------------------------------------------------------------------------------------------------------------------------------------------------------------------------------------------------------------------------------------------------------------------------------------------------------------------------------------------------------------------------------------------------------------------------------------------|
| Introduction | <ul style="list-style-type: none"> <li>We are particularly interested in your experiences and perceptions of outpatient training in the community. Could you please walk me through a typical outpatient training you have experienced? What does your outpatient training look like? How do you like your outpatient training in community?</li> </ul>                                                                                                                                                                                                                                                                                                                                                                                                                                                                                                                                                                                                                                                                                                                                                                                                                                                                                                                                                                                |
| Experiences  | <ul style="list-style-type: none"> <li>How did you prepare for your outpatient training in primary care settings?</li> <li>How many times have you had outpatient training sessions?</li> <li>Could you remember the conditions of the patients who participated in the session? Can you tell me some details of the patients?</li> <li>What kind of problems did the patients have? How did you deal with those problems?</li> <li>Could you describe the whole process of seeing a patient in an outpatient training session?</li> <li>Did you complete the whole procedure all by yourself? (If not) Which part was the most difficult? Did the patients cooperate to complete the procedure?</li> <li>How did the community preceptors demonstrate to see the patients? Was there any difference between you and community preceptor when seeing patients? If so, what were the differences?</li> <li>What impressed you that the community preceptors had demonstrated in outpatient training session?</li> <li>Did community preceptors provide feedback on treatment, prevention, management, and rehabilitation of diseases? Which part was the most/least helpful?</li> <li>Do you think the community preceptors gave you feedback that was helpful to your clinical performance? How did they give the feedback?</li> </ul> |
| Perceptions  | <ul style="list-style-type: none"> <li>How do you feel about the organization and arrangement of outpatient training in primary care settings?</li> <li>How many residents do you think would be appropriate for an outpatient training session? What are your reasons?</li> <li>How long did one outpatient training session last? Was the duration appropriate for you?</li> <li>How frequently did you attend outpatient training? Was it appropriate for you?</li> <li>When you saw a patient, would you rather have had the community preceptors stay with you in the room or stay in an observation room? What are your reasons?</li> <li>Would you rather your preceptors teach you while you see the patient, or after you complete the whole procedure? What are your reasons?</li> <li>Do you think outpatient training in primary care settings improves your clinical performance? (If yes) can you share some details?</li> <li>Are there any other benefits you have gained from the outpatient training? (If yes) What are those?</li> <li>Were there any weakness in the training session? In your opinion, how did these problems affect the training outcomes?</li> </ul>                                                                                                                                            |
| Ending words | <ul style="list-style-type: none"> <li>I have finished all my questions. Do you have any other comments on this interview?</li> <li>Thank you for your participation! After all the interviews and data analysis are completed, I may invite you to review and discuss the results of our results. I hope we can keep in touch.</li> </ul>                                                                                                                                                                                                                                                                                                                                                                                                                                                                                                                                                                                                                                                                                                                                                                                                                                                                                                                                                                                             |
